# Supplementary material for: Comprehensive study of ticks and tick-borne diseases in dogs in Nepal: Molecular identification, risk analysis and hematological alterations
Source: Research Square preprint supplement (doi:10.21203/rs.3.rs-6227949/v1), 2025-03-25
Supplement: Supplementary file 1 [file 13e3e518093c2dacd9984ea5.docx]

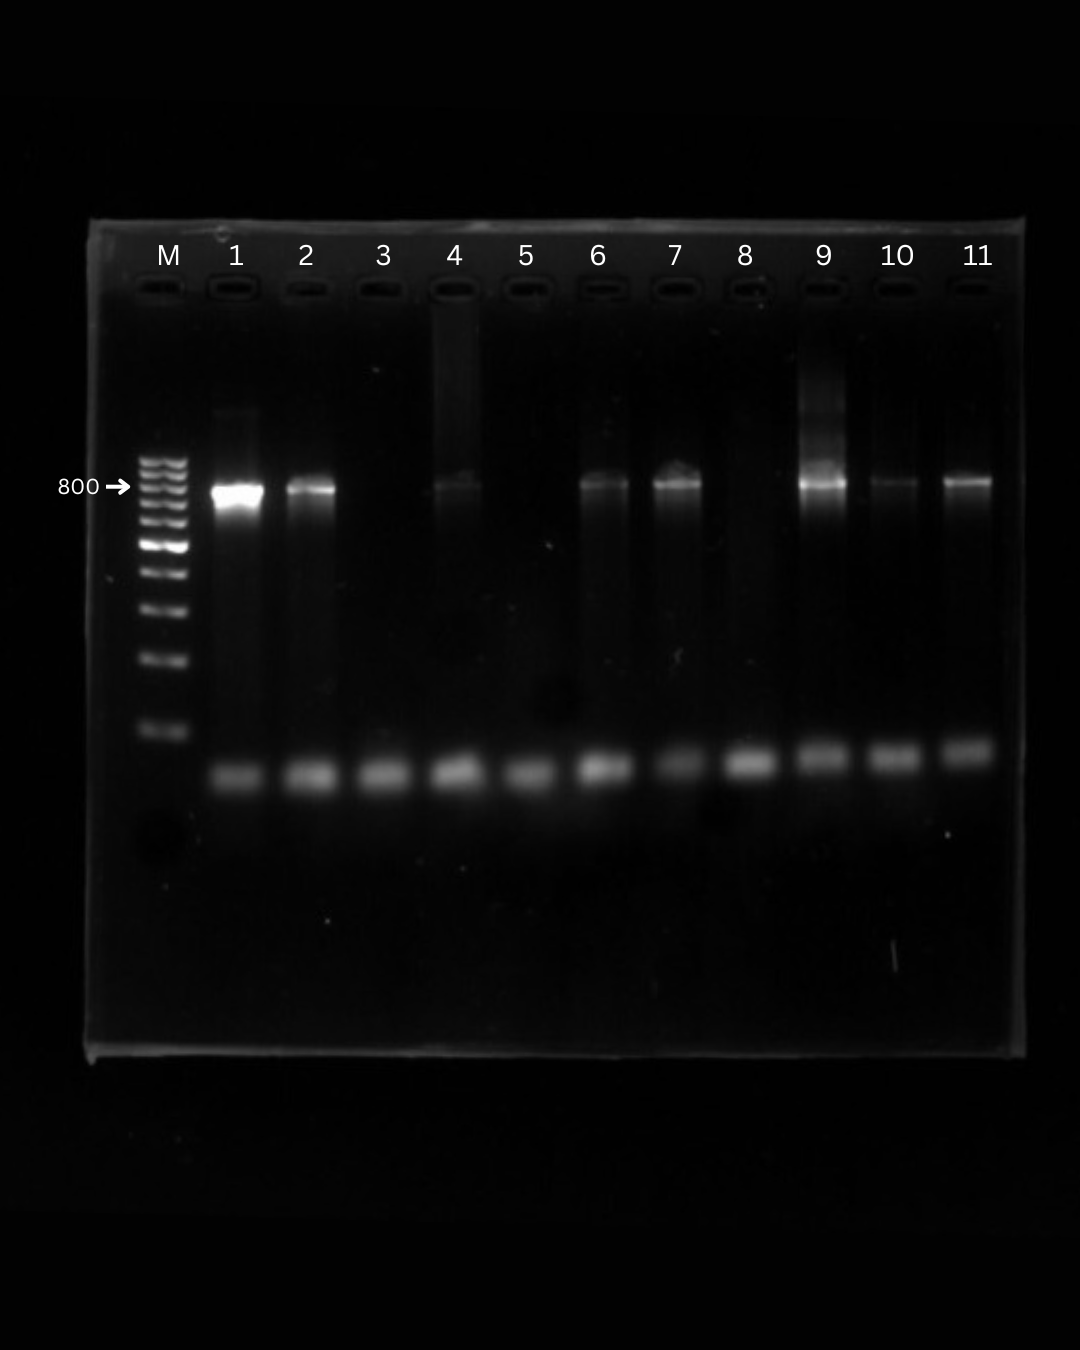

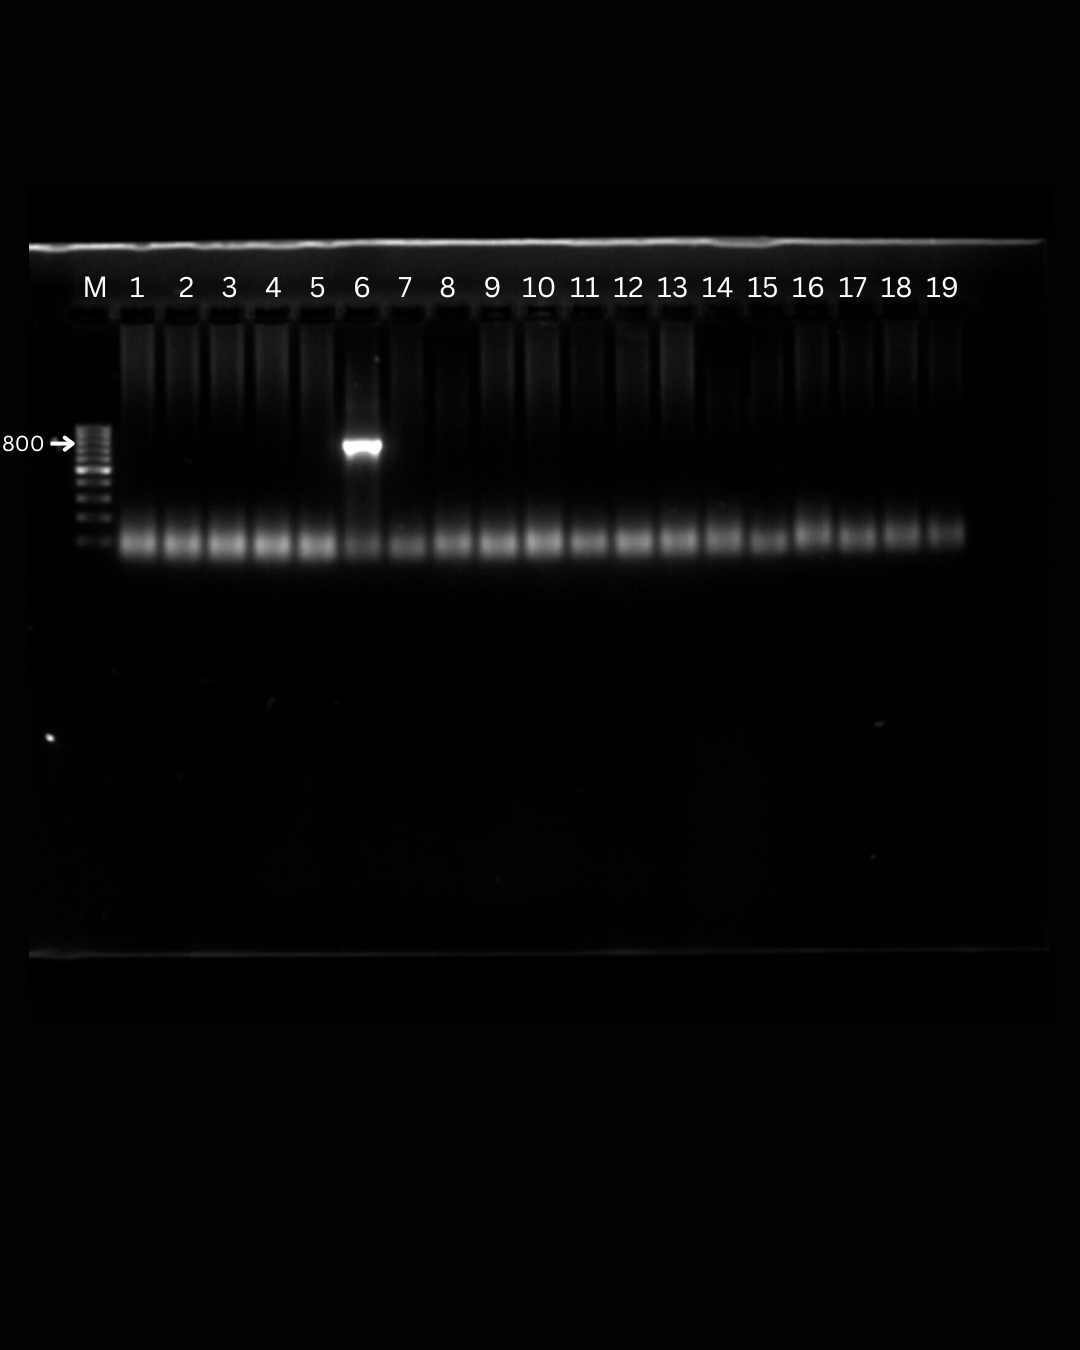

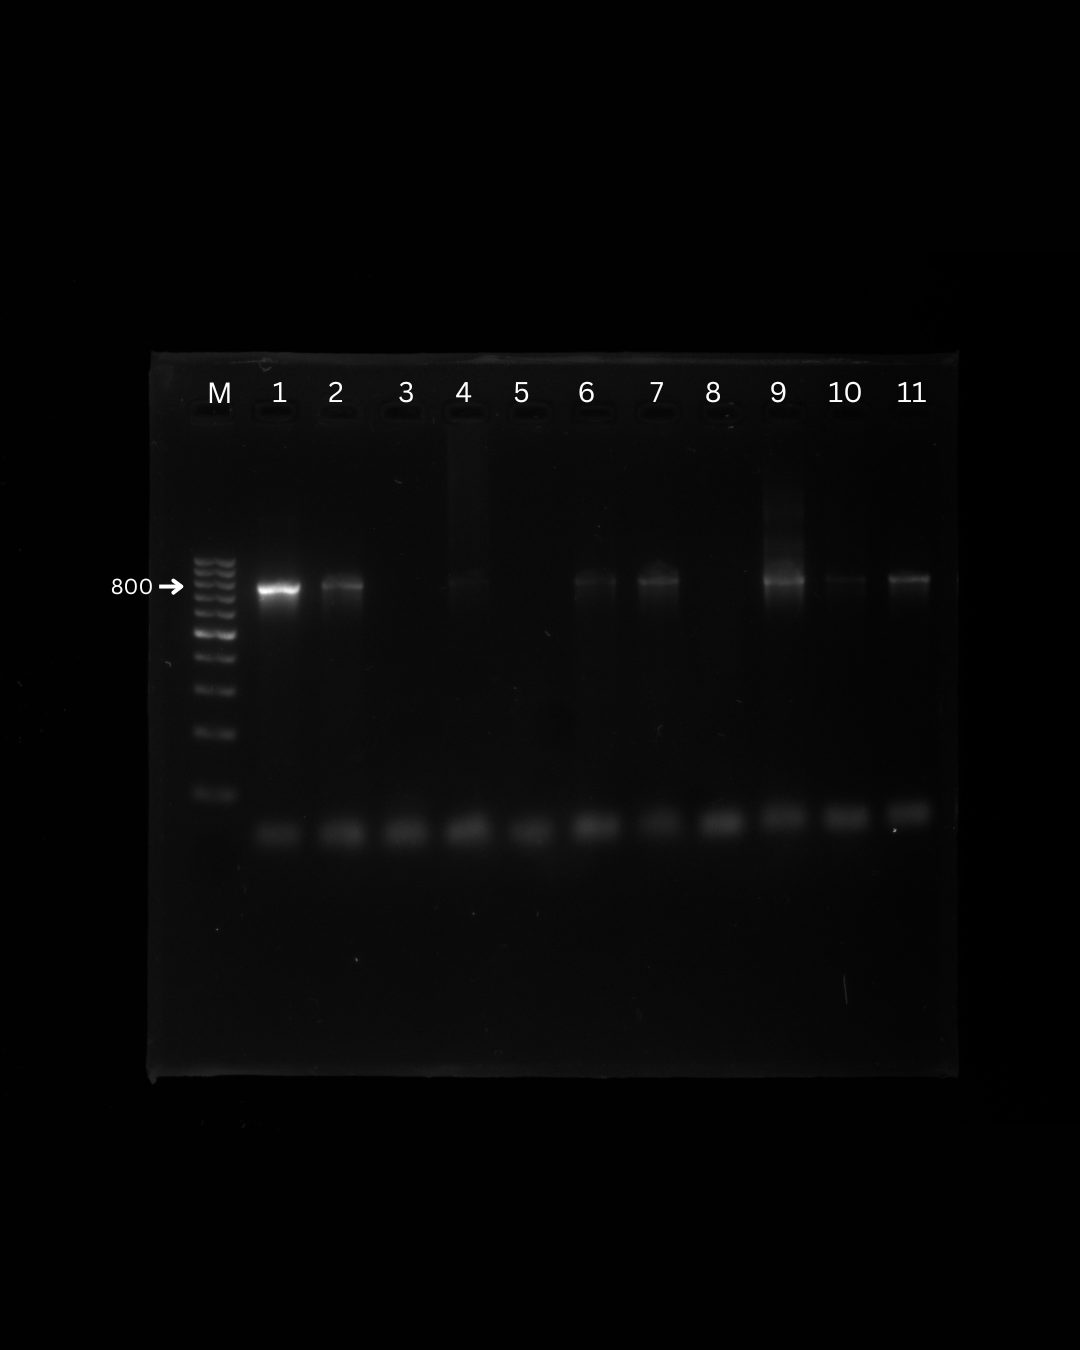


1A

1B

1C

Supplementary Figure 1: Detection of Babesia spp. by gel electrophoresis (1A, 1B, 1C).


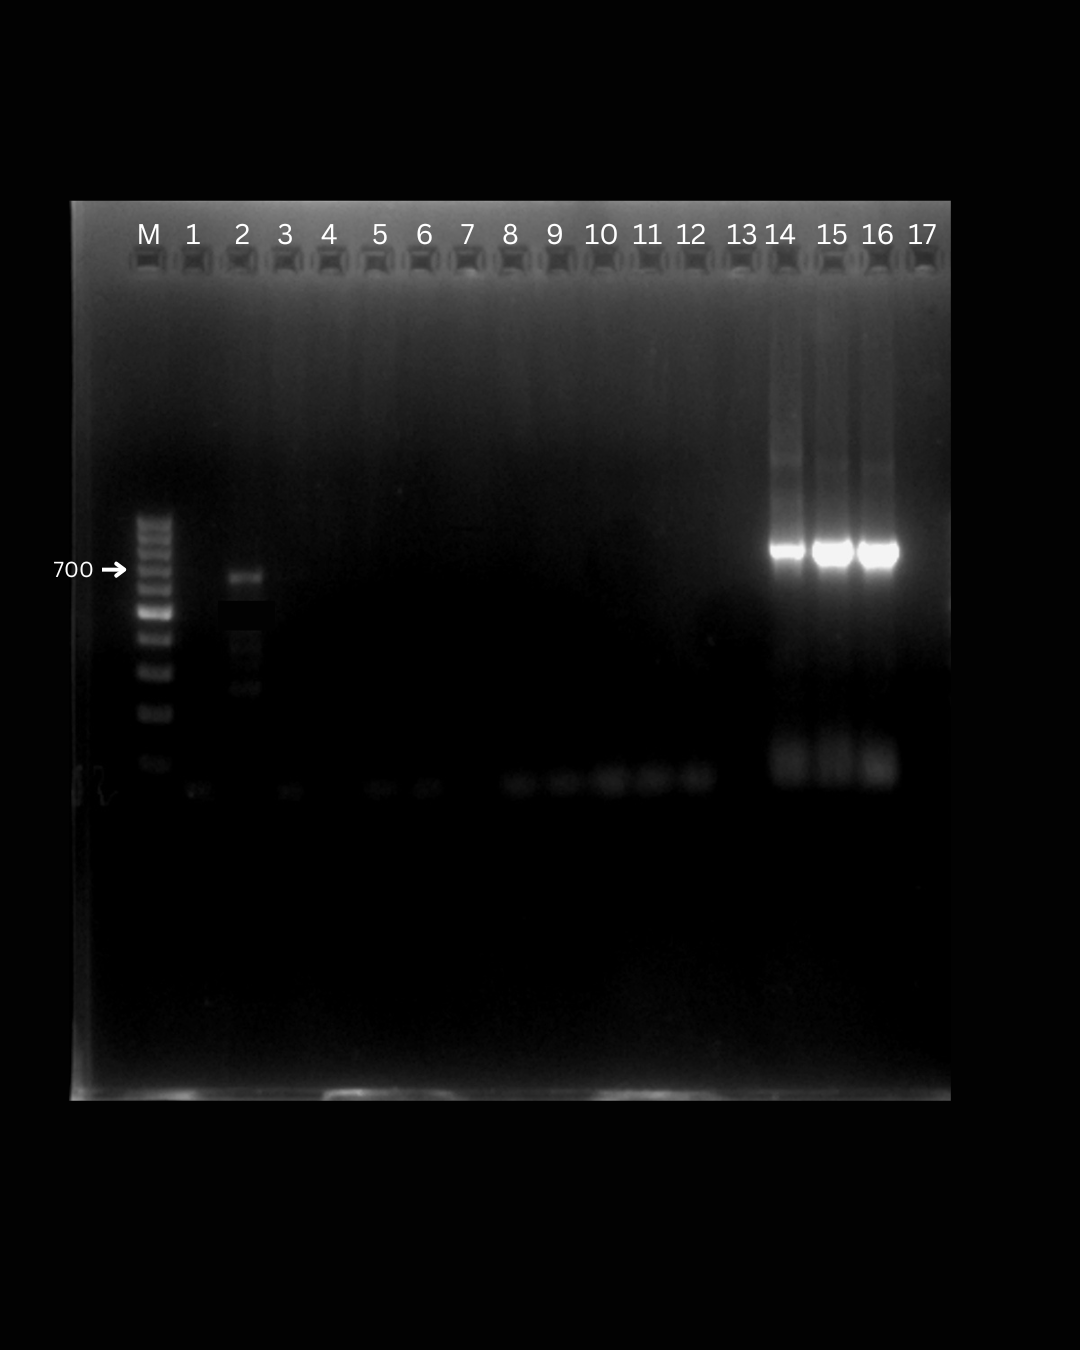

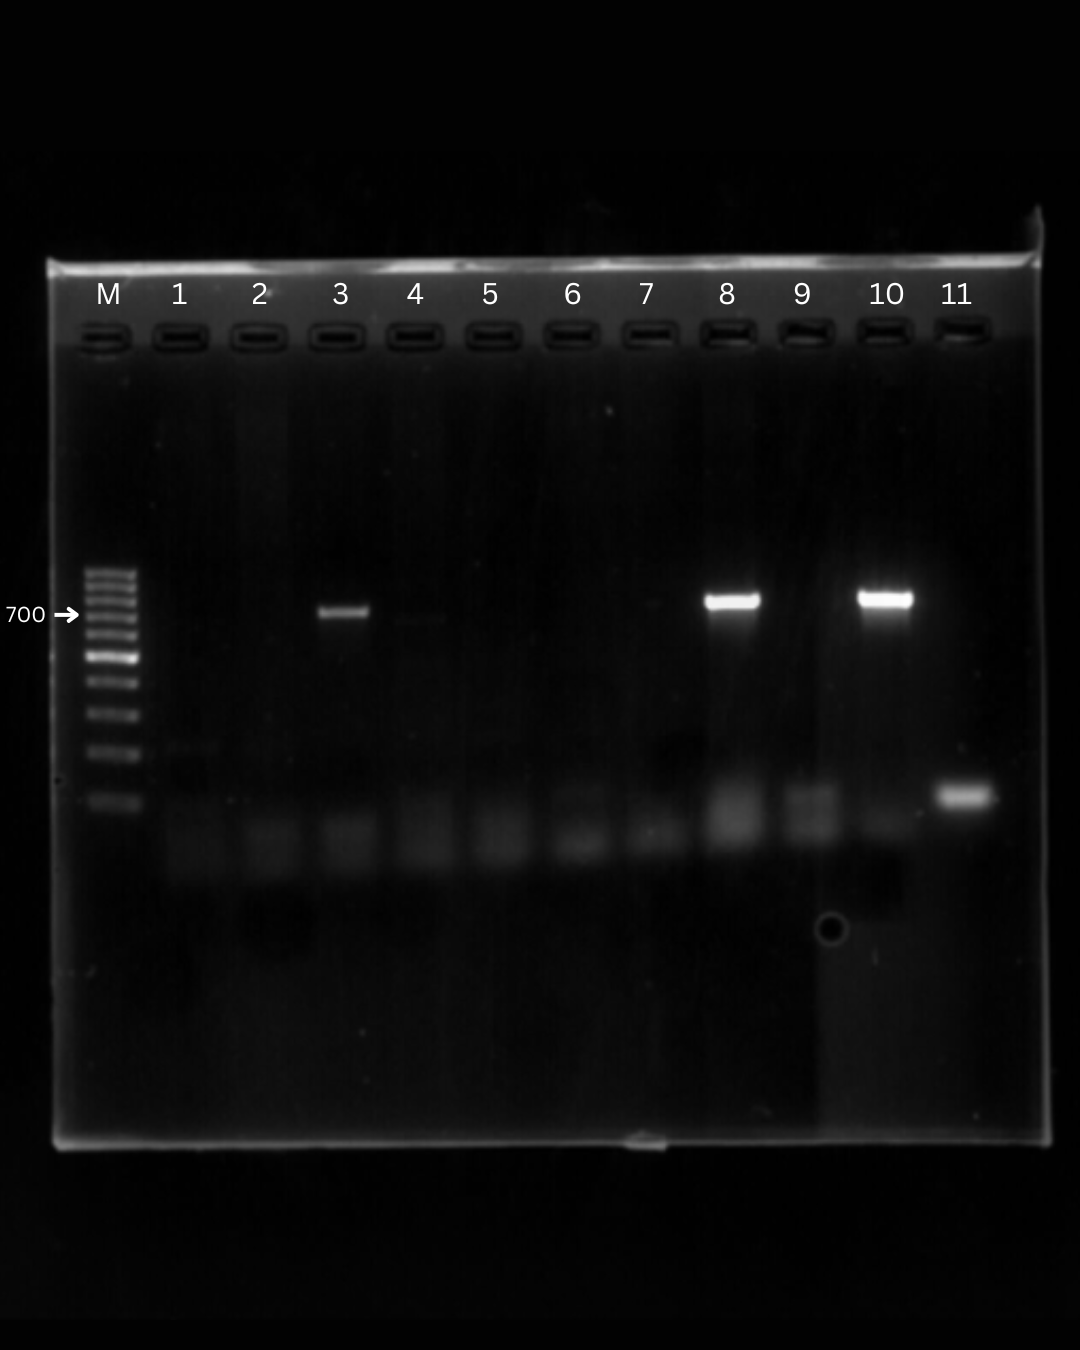


2A

2B

Supplementary Figure 2: Detection of Hepatozoon canis by gel electrophoresis (2A, 2B).


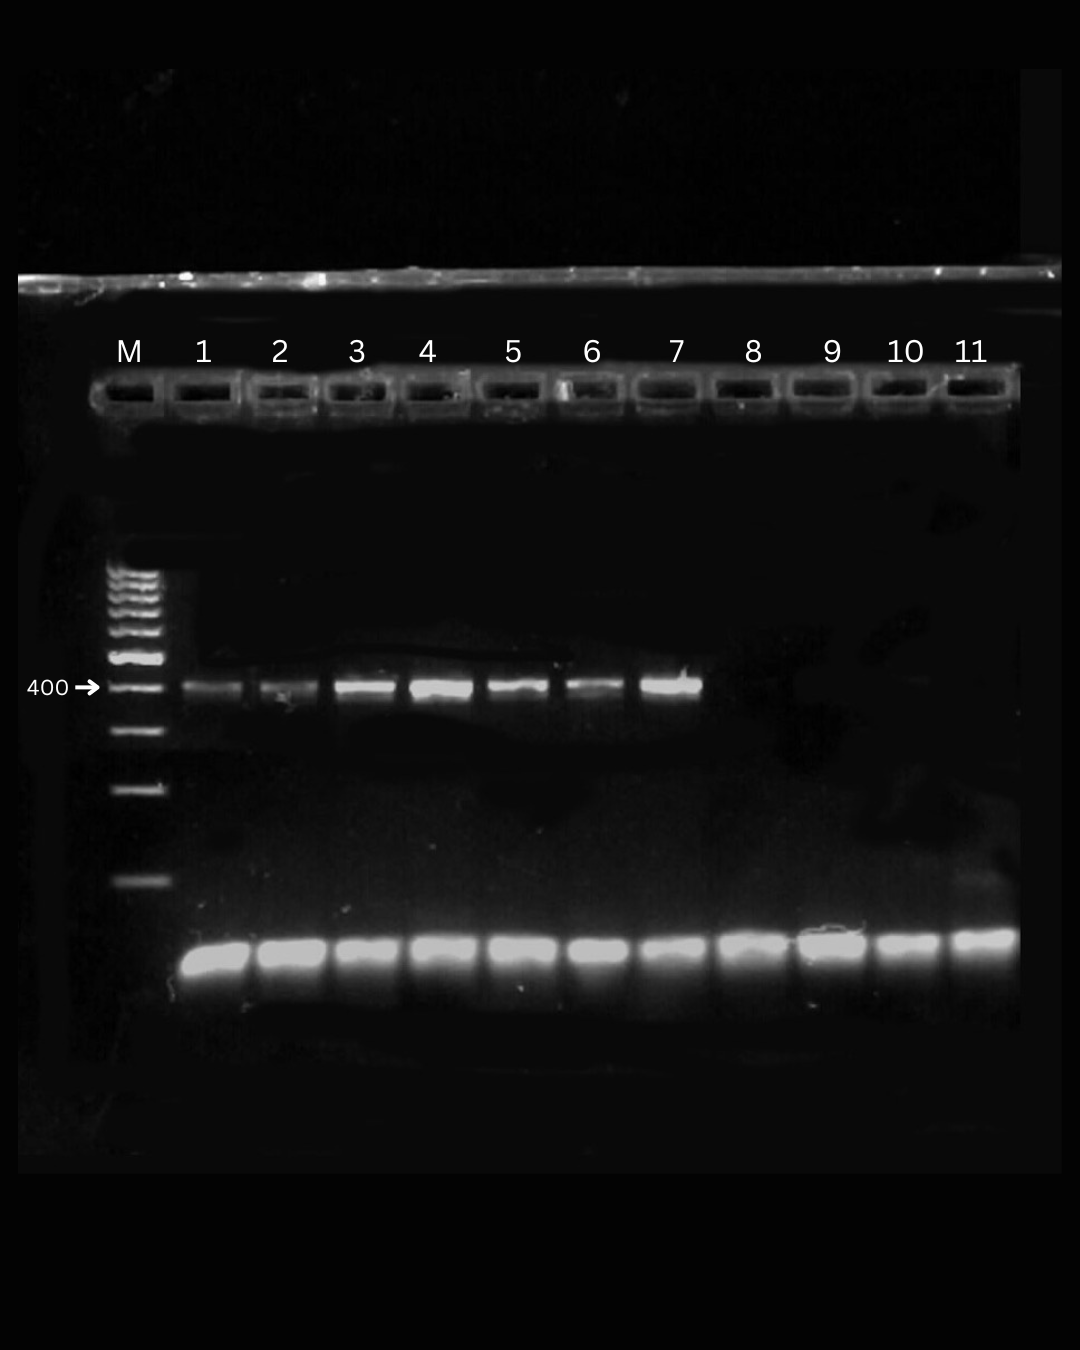

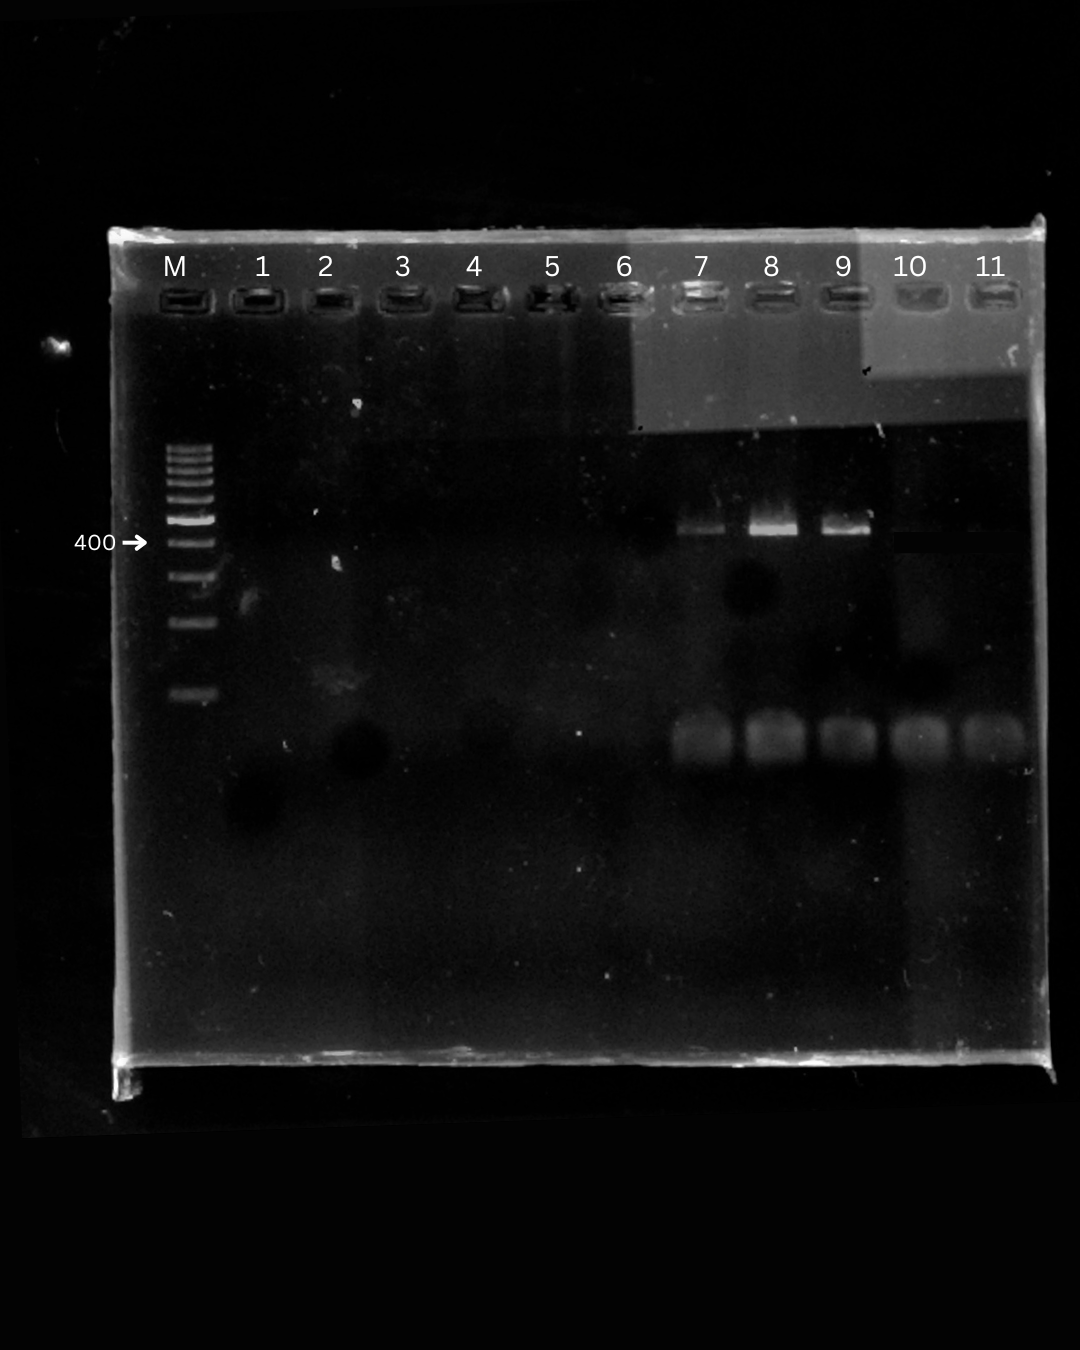


3A

3B

Supplementary figure 3: Detection of Ehrlichia canis based on gel electrophoresis (3A, 3B).


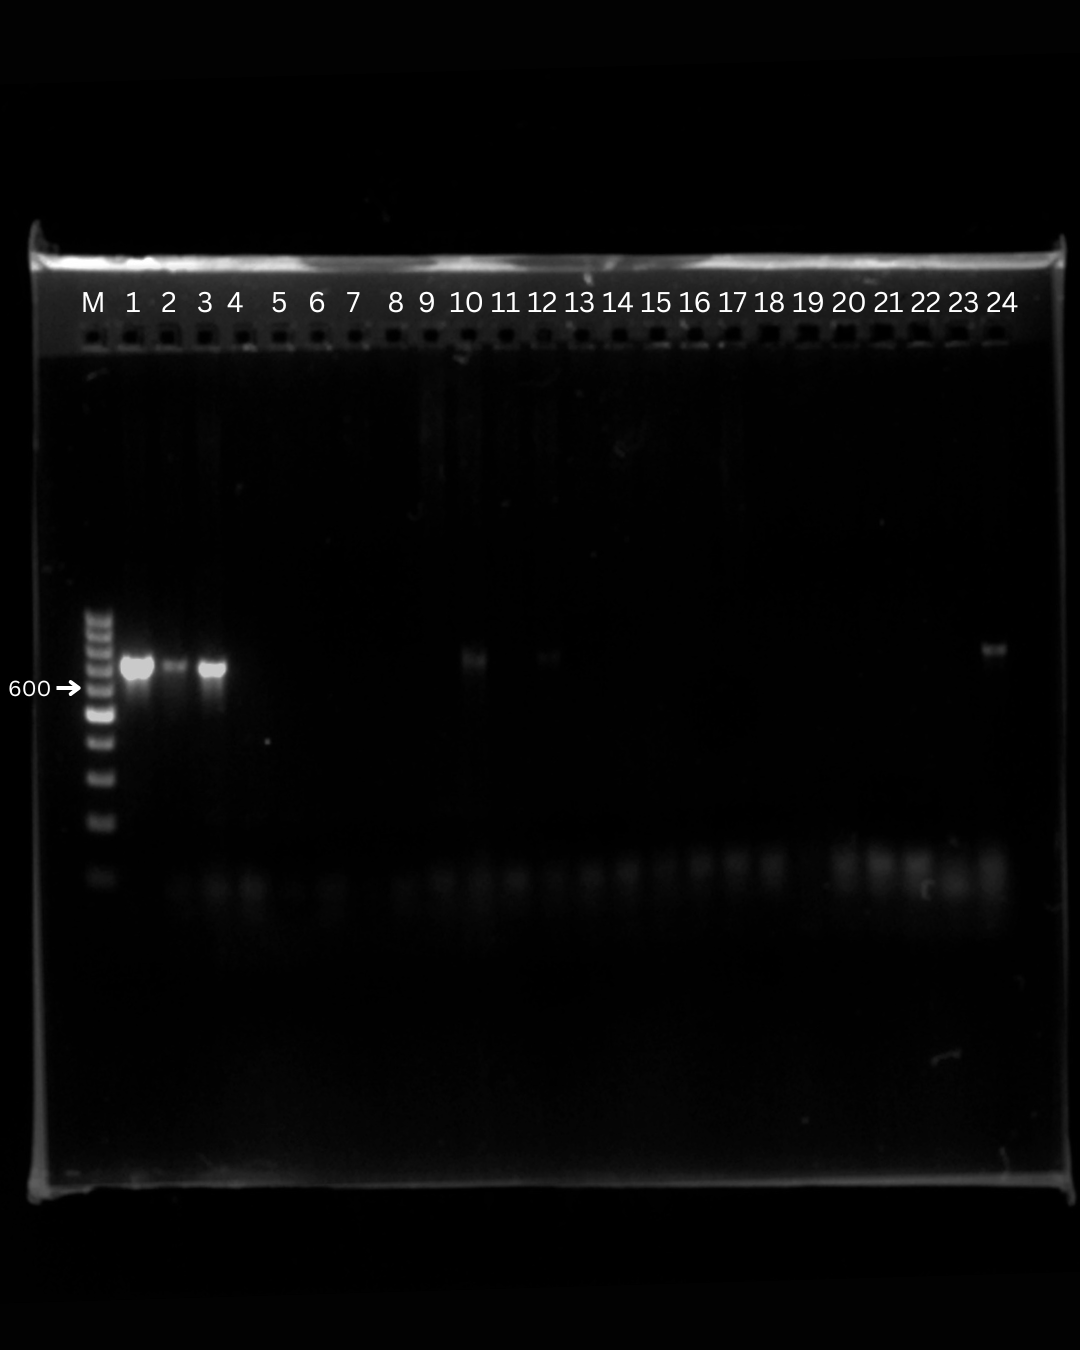

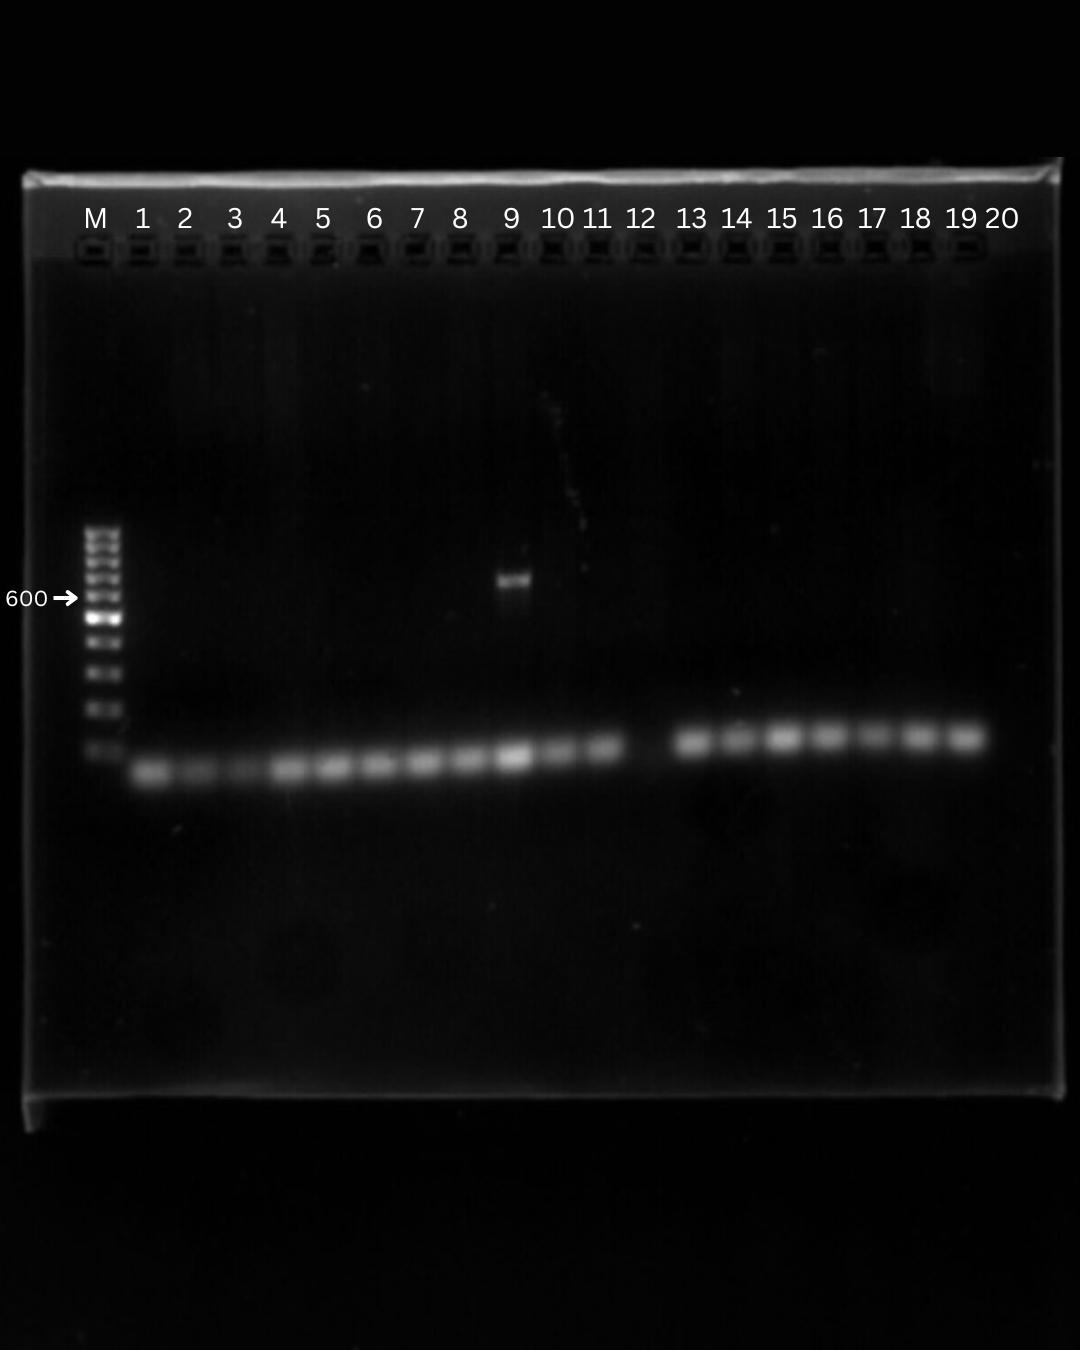


4A

4B

Supplementary figure 4: Detection of *Anaplasma platys* canis based on gel electrophoresis (A,B).
